# Supplementary material
Source: publisher site journal article supplement (doi:10.3762/bjoc.3.47)
Supplement: Additional file 1 [file 1860-5397-3-47-S1.pdf]

### **Part 3. Triethylborane-air: a suitable initiator for intermolecular radical additions of *S*-2-oxoalkyl-thionocarbonates (*S*-xanthates) to olefins**

Jean Boivin\*<sup>1</sup> and Van Tai Nguyen\*<sup>1,2</sup>

Addresses: <sup>1</sup>Institut de Chimie des Substances Naturelles, C.N.R.S., Avenue de la Terrasse, 91198 Gif-sur-Yvette, France, <sup>2</sup>Present address: National Institute of Medicine Materials, 3B, Quang Trung, Hanoi, Vietnam

Email: Jean Boivin\* - jean.boivin@icsn.cnrs-gif.fr; Van Tai Nguyen\* - htqt.imm@hn.vnn.vn

### **General procedure for intermolecular radical additions of *S*-2-oxoalkyl-thionocarbonates to olefins, reaction at room temperature**

Triethylborane (solution 1M in hexanes) was injected with the aid of a syringe pump (rate 0.03 mL/h) into a previously degassed solution of xanthate (1 mmol) and olefin (2-3 equiv) in the solvent (1 mL or, in the case of less soluble compounds, in the minimum of solvent needed to obtain a clear solution), placed in a round bottom flask equipped with a stopper connected to a rubber balloon filled with argon. Air was introduced at the same time with a second syringe pump (10 mL/h). The reaction was monitored by TLC. Evaporation of the solvents under reduced pressure gave a residue that was purified by silica gel column chromatography.

*O*-Ethyl, *S*-{6-[(4-methylphenyl)sulfonyl]-4-oxo-1-[(trimethylsilyl)methyl] hexyl} dithiocarbonate [**19a**].

Xanthate **1a** (0.172 g, 0.496 mmol), allyltrimethylsilane **9** (0.142 g, 1.24 mmol, 2.5 equiv) in CH<sub>2</sub>Cl<sub>2</sub> (1.3 mL). After 8 h (0.25 mL, 0.5 equiv of Et<sub>3</sub>B was used), the reaction was worked-up as usually. Purification by flash chromatography gave compound **19a** as a colourless oil (0.162 g, 71% yield) without any traces of reduced product. <sup>1</sup>H NMR (300 MHz, CDCl<sub>3</sub>): δ=7.76 (dd, <sup>3</sup>J=1.9 Hz, <sup>3</sup>J=8.2 Hz, 2H), 7.35 (d, <sup>3</sup>J=7.0 Hz, 2H), 4.60 (q, <sup>3</sup>J=7.1 Hz, 2H), 3.81 (m, 1H), 3.35 (t, <sup>3</sup>J=7.7 Hz, 2H), 2.84 (t, <sup>3</sup>J=7.1 Hz, 2H), 2.56 (q, <sup>3</sup>J=8.0 Hz, 2H), 2.43 (s, 3H), 2.07 (m, 1H), 1.76 (m, 1H), 1.40 (dt, <sup>3</sup>J=2.2 Hz, <sup>3</sup>J=7.1 Hz, 3H), 1.02 (2dd, <sup>3</sup>J=2.0 Hz, <sup>3</sup>J=7.0 Hz, 2H), 0.06 (s, 9H). <sup>13</sup>C NMR (75 MHz, CDCl<sub>3</sub>): δ=214.3, 205.1, 144.8, 135.8, 129.9, 127.9, 69.7, 50.5, 48.1, 39.7, 35.2; 30.5, 23.5, 21.6, 13.7, -0.9. IR (neat): ν=1716, 1315, 1245, 1209, 1145, 1110, 1086, 1045, 838, 814. HRMS (ESI) [M+Na]<sup>+</sup> Calcd. for C<sub>20</sub>H<sub>32</sub>O<sub>4</sub>S<sub>3</sub>SiNa: 483.1130. Found: 483.1085.
