# Supplementary material
Source: publisher site journal article supplement (doi:10.3762/bjoc.3.47)
Supplement: Additional file 2 [file 1860-5397-3-47-S2.pdf]

## Supporting Information Available

### Part 3. Triethylborane: A Suitable Initiator for Intermolecular Radical Additions of *S*-2-Oxoalkyl- thionocarbonates (Xanthates) to Olefins

*Jean Boivin,\*<sup>a</sup> and Van Tai Nguyen\*<sup>a,b</sup>*

a) Institut de Chimie des Substances Naturelles, C.N.R.S.,

Gif-sur-Yvette 91198, France.

b) National Institute of Medicines Materials

3B, Quang Trung, Hanoi, Vietnam

jean.boivin@icsn.cnrs-gif.fr *and* htqt.imm@hn.vnn.vn

## Table of Contents

|                                                                                                          |                 |
|----------------------------------------------------------------------------------------------------------|-----------------|
| <b>General Experimental Methods</b>                                                                      | <b>Page S3</b>  |
| <b>Reagents and Starting Materials</b>                                                                   | <b>Page S3</b>  |
| <b>Preparation of Starting Substrates</b>                                                                | <b>Page S3</b>  |
| <b>General Procedure for the Radical Addition of Xanthate to Olefin Initiated by Et<sub>3</sub>B/air</b> | <b>Page S4</b>  |
| <b>References</b>                                                                                        | <b>Page S20</b> |

## General Experimental Methods

Solvents were used as commerciale available. Experiments that required an inert atmosphere were carried out under dry argon in a flame dried glass system. Column chromatography was carried out on silica gel (230-400 mesh) by gradual elution with mixtures of n-heptane and ethyl acetate. TLC was carried out on using F<sub>254</sub> SiO<sub>2</sub> coated aluminum plates (0,2 µm, analytical). Visualization was accomplished with UV light (254 nm), and by staining (and charring) of the TLC plates with a solution of p-anisaldehyde in sulfuric acid/ethanol. <sup>1</sup>H and <sup>13</sup>C NMR spectra were recorded in deuteriochloroform on 300 MHz spectrometers. The chemical shifts are reported δ unit, parts per million (ppm) relative to deuterated solvents (<sup>1</sup>H, δ 7.269 ppm; <sup>13</sup>C, δ 77.23 ppm) or Me<sub>4</sub>Si. Splitting pattern of an apparent multiplet associated with an averaged coupling constant were designated as s (singlet), d (doublet), t (triplet), q (quartet), m (multiplet), dd (doublet of doublet), dt (doublet of triplet), dq (doublet of quartet) and br (broadened). Coupling constants (*J* value) were reported in Hz unit. IR spectra were recorded on a FT-IR as a neat. ESI and high-resolution mass spectra (HRMS) were obtained with a LCT spectrometer. Previously reported reaction products were identified by spectral comparison.

## Reagents and Starting Materials:

Triethylborane (1M solution in hexanes) was purchased from Aldrich Chemical Company, used without further purification, and stored under nitrogen atmosphere. All other commercially reagents were used as received.

## Preparation of Starting Substrates:

Compound **7a** is a known compound:<sup>1</sup>

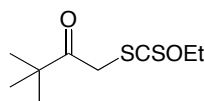

Compound **12** is a known compound:<sup>2</sup>

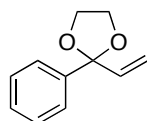

Compound **9** is a known compound:<sup>3</sup>

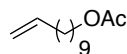

Compounds **1-6a** were prepared according to literature.<sup>4, 5, 6</sup>

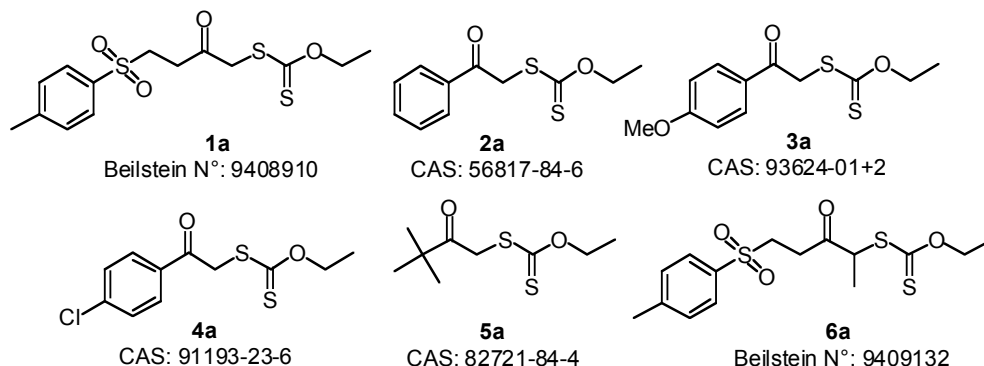

Compound **1b** is a known compound : <sup>7</sup>

### General Procedure for the Radical Addition of Xanthate to Olefin Initiated by Et<sub>3</sub>B/air:

#### Procedure A: reaction at room temperature

Triethylborane (1M solution in hexanes) was injected with the aid of a syringe pump (rate 0.03 mL/h) into a degassed solution of xanthate (1 mmol) and olefin (2-3 equiv) in the solvent (1 mL or, in the case of less soluble compounds, in the minimum of solvent needed to obtain a clear solution) placed in a round bottom flask equipped with a stopper connected to a rubber balloon filled with argon to equilibrate the pressures. Air was introduced into the solution at the same time (10 mL/h). The reaction was monitored by TLC. Evaporation of the solvent under reduced pressure afforded a residue that was purified by silica gel column chromatography.

#### Procedure B: reaction at “high” temperature

A solution of xanthate (1 mmol) and olefin (2-3 equiv) in the solvent (1 mL or, in the case of less soluble compounds, in the minimum of solvent needed to obtain a clear solution at reflux) was placed in a two-necked round bottom flask equipped with a condenser open to the air and heated to reflux. Triethylborane (1M solution in hexanes) was injected with the aid of a syringe pump (rate 0.03 mL/h) into the above solution. The reaction was monitored by TLC. Evaporation of the

solvent under reduced pressure afforded a residue that was purified by silica gel column chromatography.

***O*-Ethyl *S*-3-oxo-1-tosyltetradecan-6-yl carbonodithioate (**1c**)**

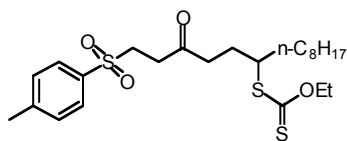

Chemical Formula: C<sub>16</sub>H<sub>21</sub>O<sub>4</sub>S<sub>3</sub>  
Exact Mass: 373,06020  
Molecular Weight: 373,53054

The title compound **1c** was prepared following the general procedure for the radical additions initiator by Et<sub>3</sub>B at room temperature, starting from xanthate **1a** (0.189 g, 0.545 mmol) and 1-decene (0.197 g, 1.38 mmol, 2.5 equiv) in dichloromethane (1.5 mL). After 7 h (0.22 mL, 0.22 mmol, 0.4 equiv of Et<sub>3</sub>B was used), the reaction was worked-up as usually. Flash chromatography gave compound **1c** as a colourless oil (0.169 g, 64% yield), and starting material **1a** (0.021 g, 11%) without any trace of reduced product **1b**. The spectral characteristics of compound **1c** were in agreement with the previously data.<sup>7</sup>

<sup>1</sup>H NMR (300 MHz, CDCl<sub>3</sub>): δ=0.85 (t, *J*=7 Hz, 3 H), 1.23 (m, 12 H), 1.40 (t, *J*=7 Hz, 3 H), 1.59 (m, 2 H), 1.75 (m, 1 H), 2.02 (m, 1 H), 2.44 (s, 3 H), 2.56 (t, *J*=7 Hz, 2 H), 2.85 (t, *J*=7.5 Hz, 2 H), 3.34 (t, *J*=7.5 Hz, 2 H), 3.66 (m, 1 H), 4.61 (q, *J*=7 Hz, 2 H), 7.35 (d, *J*=8 Hz, 2 H), 7.76 (d, *J*=8 Hz, 2 H).

<sup>13</sup>C NMR (75 MHz, CDCl<sub>3</sub>): δ=214.43, 205.08, 129.86, 127.80, 69.81, 50.81, 50.40, 39.70, 35.11, 34.40, 31.64, 29.17, 28.99, 27.76, 26.58, 22.46, 21.46, 13.88, 13.58.

IR (film): ν=1050, 1087, 1112, 1150, 1215, 1317, 1453, 1719, 2855, 2926, 2954 cm<sup>-1</sup>.

**Preparation of 1-Hydroxy-5-[(4-methylphenyl)sulfonyl]-1-phenylpentan-3-one (**1d**)**

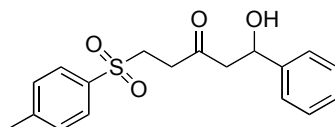

Chemical Formula: C<sub>18</sub>H<sub>20</sub>O<sub>4</sub>S  
 Exact Mass: 332,1082  
 Molecular Weight: 332,4140

A solution of Et<sub>3</sub>B (1.0 M in hexanes, 0.57 ml, 0.57 mmol, 1.2 equiv) was added to a solution of xanthate **1a** (0.165 g, 0.476 mmol) and benzaldehyde (0.071 g, 0.667 mmol, 1.4 equiv) in CH<sub>2</sub>Cl<sub>2</sub> (2 mL) at room temperature under argon atmosphere. The mixture was stirred for 1 h then the rubber stopper was replaced by a drying tube filled with Drierite and CaCl<sub>2</sub>. After 1 h, the solvent was concentrated in vacuo and the residue was purified by flash chromatography (heptane/EtOAc = 8/2 then 7/3) to furnish **1d** as a white solid (0.076 g, 48 %, m.p. 111.5-113°C), compound **1b** (0.012 g, 12%) and starting material **1a** (0.010 g, 6%).

<sup>1</sup>H NMR (300 MHz, CDCl<sub>3</sub>): δ=7.78 (d, *J*=8.3 Hz, 2 H), 7.40-7.25 (m, 7 H), 5.13 (dd, *J*=3.3 Hz, and *J*=9.3 Hz, 1 H), 3.38 (t, *J*=7.1 Hz, and *J*=7.7 Hz, 2 H), 2.93 (t, *J*=7.1 Hz, and *J*=7.7 Hz, 2 H), 2.88 (d, *J*=9.3 Hz, 1 H), 2.76 (dd, *J*=3.3 Hz, and *J*=9.3 Hz, 1 H), 2.47 (s, 3 H); <sup>13</sup>C NMR (75 MHz, CDCl<sub>3</sub>): δ=205.9, 145.1, 142.6, 135.9, 130.0, 128.6, 128.0, 127.9, 125.6, 69.9, 51.5, 50.4, 36.1, 21.7; IR (neat): ν=3496, 1702, 1308, 1272, 1147, 1086, 1038, 1023, 748, 697, 685, and 647 cm<sup>-1</sup>. HRMS (ESI): [M+Na]<sup>+</sup> Calcd. for C<sub>18</sub>H<sub>20</sub>O<sub>4</sub>SNa: 345.0975. Found: 355.0947.

## 2-[(Ethoxycarbonothioyl)thio]-7-[(4-methylphenyl)sulfonyl]-5-oxoheptyl acetate (**17a**)

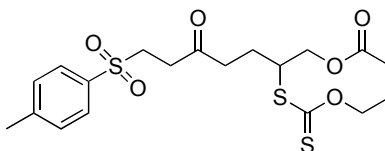

The title compound **17a** was prepared following the general procedure for the radical additions initiator by Et<sub>3</sub>B at room temperature, starting from xanthate **1a** (0.185 g, 0.534 mmol) and allyl acetate (0.134 g, 1.34 mmol, 2.5 equiv) in dichloromethane (1.5 mL). After 9 h (0.27 mL, 0.27 mmol, 0.5 equiv of Et<sub>3</sub>B was used), the reaction was worked-up as usually. Purification by chromatography gave compound **17a** as a colourless syrup (0.121 g, 51% yield), and starting material **1a** (0.038 g, 21%) without any trace of reduced product **17b**.

This compound was also prepared following the general procedure for the radical additions initiator by Et<sub>3</sub>B at high temperature [(CH<sub>2</sub>Cl)<sub>2</sub> reflux], starting from xanthate **1a** (0.346 g, 1.0 mmol) and allyl acetate (0.20 g, 2.0 mmol, 2 equiv) in 1,2-dichloroethane (1 mL). After 3.5 h (0.11 mL, 0.11 mmol, 0.11 equiv of Et<sub>3</sub>B was used), the reaction was worked-up as usually. Purification by chromatography gave compound **17a** (0.347 g, 78% yield) without reduced product **17b**.

<sup>1</sup>H NMR (300 MHz, CDCl<sub>3</sub>): δ=7.76 (d, <sup>3</sup>J=8.3 Hz, 2H), 7.36 (d, <sup>3</sup>J=8.5 Hz, 2H), 4.63 (q, <sup>3</sup>J=7.1 Hz, 2H), 4.27 (dd, <sup>3</sup>J=5 Hz and <sup>3</sup>J'=11.4 Hz, 1H), 4.19 (dd, <sup>3</sup>J=6.1 Hz and <sup>3</sup>J=11.4 Hz, 1H), 3.92 (m, 1H), 3.35 (t, <sup>3</sup>J=7.5 Hz, 2H), 2.86 (t, <sup>3</sup>J=7.5 Hz, 2H), 2.63 (t, <sup>3</sup>J=7.5 Hz, 2H), 2.45 (s, 3H), 2.10 (m, 1H), 2.05 (s, 3H), 1.81 (m, 1H), 1.41 (t, <sup>3</sup>J=7.1 Hz, 2H); <sup>13</sup>C NMR (75 MHz, CDCl<sub>3</sub>): δ=212.90, 204.78, 170.66, 145.04, 135.88, 130.05, 128.00, 70.54, 65.62, 50.56, 48.90, 39.71, 35.25, 24.39, 21.67, 20.80, 13.75; IR (film): ν=1737, 1715, 1379, 1362, 1313, 1216, 1144, 1109, 1085, 1040, 813, 762, 722 cm<sup>-1</sup>; HRMS (ESI): [M+Na]<sup>+</sup> Calcd. for C<sub>19</sub>H<sub>26</sub>O<sub>6</sub>S<sub>3</sub>Na 469.0789. Found 469.0789.

***O*-Ethyl *S*-[1-methyl-1-((1*R*)-4-{5-[(4-methylphenyl)sulfonyl]-3-oxopentyl}cyclohex-3-en-1-yl)ethyl] dithiocarbonate (**18a**)**

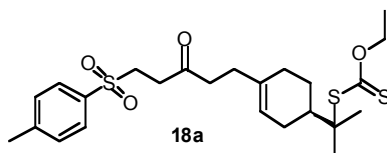

Chemical Formula: C<sub>24</sub>H<sub>34</sub>O<sub>4</sub>S<sub>3</sub>  
Exact Mass: 482,161.92  
Molecular Weight: 482,719.36

The title compound **18a** was prepared following the general procedure for the radical additions initiator by Et<sub>3</sub>B at room temperature, starting from xanthate **1a** (0.186 g, 0.537 mmol) and β-pinene (0.183 g, 1.34 mmol, 2.5 equiv) in dichloromethane (1.5 mL). After 9 h (0.27 mL, 0.27 mmol, 0.5 equiv of Et<sub>3</sub>B was used), the reaction was worked-up as usually. Purification by flash chromatography gave compound **18a** as a yellow oil (0.114 g, 44%), the starting material **1a** (0.037 g, 20%), and product **18b** (0.023 g, 12%).

This compound was also prepared following the general procedure for the radical additions initiated by Et<sub>3</sub>B at high temperature [(CH<sub>2</sub>Cl)<sub>2</sub> reflux], starting from xanthate **1a** (0.405 g, 1.17 mmol) and β-pinene (0.318 g, 2.34 mmol, 2 equiv) in 1,2-dichloroethane (1.5 mL). After 6.5 h (0.2 mL, 0.2 mmol, 0.17 equiv of Et<sub>3</sub>B was used), the reaction was worked-up as usually. Purification by flash chromatography gave compound **18a** (0.446 g, 79% yield), without any reduced product.

<sup>1</sup>H NMR (300 MHz, CDCl<sub>3</sub>): δ=7.75 (d, <sup>3</sup>J=8.2 Hz, 2H), 7.34 (d, <sup>3</sup>J=8.2 Hz, 2H), 5.30 (d, <sup>3</sup>J=4.0 Hz, 1H), 4.64 (q, <sup>3</sup>J=7.2 Hz, 2H), 3.33 (t, <sup>3</sup>J=7.5 Hz, 2H), 2.86 (t, <sup>3</sup>J=7.5 Hz, 2H), 2.50 (t, <sup>3</sup>J=7.5 Hz, 2H), 2.43 (s, 3H), 2.16 (t, <sup>3</sup>J=7.5 Hz, 2H), 2.10-1.76 (m, 7H), 1.44 (s, 6H), 1.41 (t, <sup>3</sup>J=7.2 Hz, 3H); <sup>13</sup>C NMR (75 MHz, CDCl<sub>3</sub>): δ=214.17, 205.74, 144.89, 135.89, 135.71, 129.93, 127.88, 120.79, 69.28, 58.94, 50.52, 42.60, 41.00, 34.92, 30.79, 29.44, 26.92, 25.06, 24.71, 24.41, 21.58, 13.69; IR (neat): ν =1714, 1364, 1314, 1301, 1287, 1224, 1144, 1109, 1084, 1034, 813 cm<sup>-1</sup>; HRMS (ESI): [M+Na]<sup>+</sup> Calcd. for C<sub>24</sub>H<sub>34</sub>O<sub>4</sub>S<sub>3</sub>Na: 505.1517. Found: 505.1509.

***O*-Ethyl *S*-{6-[(4-methylphenyl)sulfonyl]-4-oxo-1-[(trimethylsilyl)methyl]hexyl} dithiocarbonate (**19a**)**

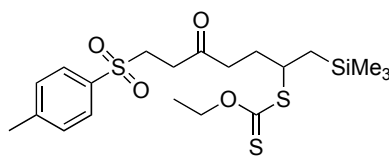

Chemical Formula: C<sub>20</sub>H<sub>32</sub>O<sub>4</sub>S<sub>3</sub>Si  
 Exact Mass: 460,1232  
 Molecular Weight: 460,7462

The title compound **19a** was prepared following the general procedure for the radical additions initiated by Et<sub>3</sub>B/O<sub>2</sub> at room temperature, see Experimental Section in the Note.

The title compound **19a** was also prepared following the general procedure for the radical additions initiated by Et<sub>3</sub>B/O<sub>2</sub> at high temperature (refluxing CH<sub>2</sub>Cl<sub>2</sub>), starting from xanthate **1a** (0.172 g, 0.496 mmol) and allyltrimethylsilane **9** (0.142 g, 1.24 mmol, 2.5 equiv) in CH<sub>2</sub>Cl<sub>2</sub> (1 mL). After 4 h (0.15 mL, 0.15 mmol 0.3 equiv of Et<sub>3</sub>B was used), the reaction was worked-up as usually. Purification by flash chromatography gave compound **19a** as a colourless oil (0.176 g, 77% yield) without any traces of reduced product.



$^1\text{H}$  NMR (300 MHz,  $\text{CDCl}_3$ ):  $\delta$ =7.76 (dd,  $J$ =1.9 Hz,  $J$ =8.2 Hz, 2H), 7.35 (d,  $J$ =7.0 Hz, 2H), 4.60 (q,  $J$ =7.1 Hz, 2H), 3.81 (m, 1H), 3.35 (t,  $J$ =7.7 Hz, 2H), 2.84 (t,  $J$ =7.1 Hz, 2H), 2.56 (q,  $J$ =8.0 Hz, 2H), 2.43 (s, 3H), 2.07 (m, 1H), 1.76 (m, 1H), 1.40 (dt,  $J$ =2.2 Hz,  $J$ =7.1 Hz, 3H), 1.02 (2dd,  $J$ =2.0 Hz,  $J$ =7.0 Hz, 2H), 0.06 (s, 9H).  $^{13}\text{C}$  NMR (75 MHz,  $\text{CDCl}_3$ ):  $\delta$ =214.3, 205.1, 144.8, 135.8, 129.9, 127.9, 69.7, 50.5, 48.1, 39.7, 35.2; 30.5, 23.5, 21.6, 13.7, -0.9. IR (neat):  $\nu$ =1716, 1315, 1245, 1209, 1145, 1110, 1086, 1045, 838, 814. HRMS (ESI)  $[\text{M}+\text{Na}]^+$  Calcd. for  $\text{C}_{20}\text{H}_{32}\text{O}_4\text{S}_3\text{SiNa}$ : 483.1130. Found: 483.1085.

***O*-Ethyl *S*-[6-[(4-methylphenyl)sulfonyl]-4-oxo-1-(trimethylsilyl)hexyl] dithiocarbonate (20a)**

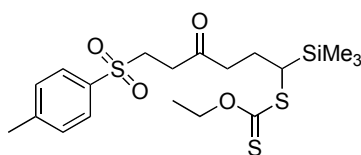

Chemical Formula:  $\text{C}_{19}\text{H}_{30}\text{O}_4\text{S}_3\text{Si}$   
 Exact Mass: 446,1075  
 Molecular Weight: 446,7196

The title compound **20a** was prepared following the general procedure for the radical additions initiated by  $\text{Et}_3\text{B}/\text{O}_2$  at room temperature, starting from xanthate **1a** (0.172 g, 0.496 mmol) and vinyltrimethylsilane **10** (0.124 g, 1.24 mmol, 2.5 equiv) in  $\text{CH}_2\text{Cl}_2$  (1.3 mL). After 8 h (0.25 mL, 0.5 equiv of  $\text{Et}_3\text{B}$  was used), the reaction was worked-up as usually. Purification by flash chromatography gave compound **20a** as a colourless oil (0.127 g, 57% yield) without any traces of reduced product.

The title compound **20a** was also prepared following the general procedure for the radical additions initiated by  $\text{Et}_3\text{B}/\text{O}_2$  at high temperature (refluxing  $\text{CH}_2\text{Cl}_2$ ), starting from xanthate **1a** (0.172 g, 0.496 mmol) and vinyltrimethylsilane **10** (0.124 g, 1.24 mmol, 2.5 equiv) in  $\text{CH}_2\text{Cl}_2$  (1 mL). After 1.5 h another portion of vinyltrimethylsilane **10** (0.124 g, 1.24 mmol, 2.5 equiv) was added. After 4 h (0.15 mL, 0.15 mmol, 0.3 equiv of  $\text{Et}_3\text{B}$  was used), the reaction was worked-up as usually. Purification by flash chromatography gave compound **20a** as a colourless oil (0.162 g, 73% yield) without any traces of reduced product.

$^1\text{H}$  NMR (300 MHz,  $\text{CDCl}_3$ ):  $\delta$ =7.77 (d,  $J$ =8.2 Hz, 2H),  $\delta$ =7.36 (d,  $J$ =8.4 Hz, 2H), 4.63 (q,  $J$ =7.1 Hz, 2H), 3.35 (dt,  $J$ =2.0 Hz,  $J$ =7.4 Hz, 2H), 3.09 (dd,  $J$ =3.4 Hz,  $J$ =11.2 Hz, 2H), 2.83 (dt,  $J$ =2.8

Hz,  $J=7.3$  Hz, 2H), 2.59 (m, 2H), 2.45 (s, 3H), 2.14 (m, 1H), 1.61 (m, 1H), 1.42 (t,  $J=7.1$  Hz, 3H), 0.09 (s, 9H).  $^{13}\text{C}$  NMR (75 MHz,  $\text{CDCl}_3$ ):  $\delta=216.9$ , 205.6, 144.8, 135.9, 129.9, 127.9, 70.6, 50.5, 40.8, 36.3, 35.3, 24.3, 21.6, 13.8, -2.8. IR (neat):  $\nu=1715$ , 1210, 1145, 1109, 1085, 1042, 837. HRMS (ESI)  $[\text{M}+\text{Na}]^+$  Calcd. for  $\text{C}_{19}\text{H}_{30}\text{O}_4\text{S}_3\text{SiNa}$ : 469.0973. Found: 469.0993.

***O*-Ethyl *S*-{6-[(4-methylphenyl)sulfonyl]-4-oxo-1-[(4,4,5,5-tetramethyl-1,3,2-dioxaborolan-2-yl)methyl]hexyl} dithiocarbonate (**21a**)**

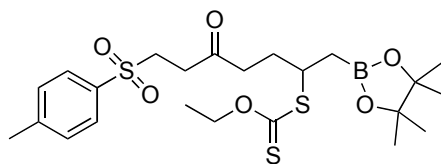

Chemical Formula:  $\text{C}_{23}\text{H}_{35}\text{BO}_6\text{S}_3$   
 Exact Mass: 514,1689  
 Molecular Weight: 514,5264

The title compound **21a** was prepared following the general procedure for the radical additions initiated by  $\text{Et}_3\text{B}/\text{O}_2$  at room temperature, starting from xanthate **1a** (0.172 g, 0.496 mmol) and allylboronic acid pinacol cyclic ester **11** (0.209 g, 1.24 mmol, 2.5 equiv) in  $\text{CH}_2\text{Cl}_2$  (1.3 mL). After 8 h (0.25 mL, 0.5 equiv of  $\text{Et}_3\text{B}$  was used), the reaction was worked-up as usually. Purification by flash chromatography gave compound **21a** as a colourless oil (0.105 g, 41% yield) without any traces of reduced compound.

The title compound **21a** was also prepared following the general procedure for the radical additions initiated by  $\text{Et}_3\text{B}/\text{O}_2$  at high temperature (refluxing  $\text{CH}_2\text{Cl}_2$ ), starting from xanthate **1a** (0.172 g, 0.496 mmol) and allylboronic acid pinacol cyclic ester **11** (0.209 g, 1.24 mmol, 2.5 equiv) in  $\text{CH}_2\text{Cl}_2$  (1 mL). After 4 h (0.15 mL, 0.15 mmol, 0.3 equiv of  $\text{Et}_3\text{B}$  was used), the reaction was worked-up as usually. Purification by flash chromatography gave compound **21a** as a colourless oil (0.138 g, 54% yield) without any traces of reduced product.

$^1\text{H}$  NMR (300 MHz,  $\text{CDCl}_3$ ):  $\delta=7.76$  (d,  $J=8.0$  Hz, 2H),  $\delta=7.36$  (d,  $J=8.0$  Hz, 2H), 4.62 (q,  $J=7.1$  Hz, 2H), 3.88 (m, 1H), 3.35 (t,  $J=7.5$  Hz, 2H), 2.56 (t,  $J=7.5$  Hz, 2H), 2.44 (s, 3H), 2.03 (m, 1H), 1.90 (m, 1H), 1.40 (t,  $J=7.1$  Hz, 3H), 1.22 (s, 12H).  $^{13}\text{C}$  NMR (75 MHz,  $\text{CDCl}_3$ ):  $\delta=214.1$ , 205.1, 144.9, 135.9, 130.0, 127.9, 83.5, 69.7, 50.6, 47.1, 40.0, 35.2, 29.8, 24.72, 24.69, 21.6, 13.7. IR

(neat):  $\nu=1716, 1365, 1315, 1212, 1140, 1109, 1086, 1045, 845, 814$ . HRMS (ESI)  $[M+Na]^+$   
 Calcd. for  $C_{23}H_{35}BO_6S_3Na$ : 537, 1587. Found: 537, 1572.

***S*-{1-(Diethoxymethyl)-6-[(4-methylphenyl)sulfonyl]-4-oxohexyl} *O*-ethyl dithiocarbonate (22a)**

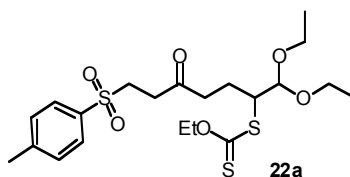

Chemical Formula:  $C_{21}H_{32}O_6S_3$   
 Exact Mass: 476.13610  
 Molecular Weight: 476.67018

The title compound **22a** was prepared following the general procedure for the radical additions initiator by  $Et_3B$  at high temperature ( $CH_2Cl_2$  reflux), starting from xanthate **1a** (0.257 g, 0.742 mmol) and acrolein diethylacetal (0.34 mL, 0.290 g, 2.23 mmol, 3.0 equiv) in dichloromethane (1.5 mL). After 9 h (0.27 mL, 0.27 mmol, 0.5 equiv of  $Et_3B$  was used), the reaction was worked-up as usually. Purification by flash chromatography gave compound **22a** as a pale yellow oil (0.263 g, 74%) and some starting material **1a** (0.015 g, 6%). The spectral characteristics of compound **22a** were in agreement with the previously reported data.<sup>6</sup>

$^1H$  NMR (300 MHz,  $CDCl_3$ ):  $\delta=7.69$  (d,  $^3J=8.1$  Hz, 2H), 7.30 (d,  $^3J=8.1$  Hz, 2H), 4.56 (q,  $^3J=7.2$  Hz, 2H), 4.46 (d,  $^3J=2.9$  Hz, 1H), 3.96 (m, 1H), 3.58 (m, 4H), 3.32 (dt,  $^3J=1.3$  Hz,  $^3J=7.6$  Hz, 2H), 2.82 (dt,  $^3J=1.5$  Hz,  $^3J=7.6$  Hz, 2H), 2.60 (dt,  $^3J=1.8$  Hz,  $^3J=7.3$  Hz, 2H), 2.43 (s, 3H), 2.19 (m, 1H), 1.81 (m, 1H), 1.39 (t,  $^3J=7.2$  Hz, 3H); 1.17 (m, 6H);  $^{13}C$  NMR (65 MHz,  $CDCl_3$ ):  $\delta=214.0, 204.7, 144.3, 135.5, 129.5, 127.5, 103.4, 69.8, 64.0, 63.3, 52.8, 50.1, 39.3, 34.8, 21.7, 21.1, 14.7, 13.3$ ; IR (film):  $\nu=2977, 2929, 2896, 1718, 1597, 1444, 1406, 1316, 1219, 1148, 1111, 1053, 815\text{ cm}^{-1}$ .

***O*-Ethyl *S*-[4-oxo-4-phenyl-1-(2-phenyl-1,3-dioxolan-2-yl)butyl] dithiocarbonate (23a)**

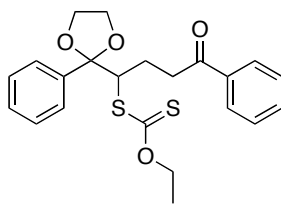

Chemical Formula: C<sub>22</sub>H<sub>24</sub>O<sub>4</sub>S<sub>2</sub>  
 Exact Mass: 416,1116  
 Molecular Weight: 416,5536

The title compound **23a** was prepared following the general procedure for the radical additions initiated by Et<sub>3</sub>B at “high” temperature (CH<sub>2</sub>Cl<sub>2</sub> reflux), starting from xanthate **2a** (0.182 g, 0.76 mmol) and phenyl vinyl dioxolane (0.267 g, 1.52 mmol, 2 equiv) in dichloromethane (1 mL). After 8 h (0.3 equiv of Et<sub>3</sub>B was used), the reaction was worked-up as usually. Purification by flash chromatography gave compound **23a** as a colourless oil (0.161 g, 51% yield) and reduced product **2b** (0.011 g, 12% ).

**Compound 23a:** <sup>1</sup>H NMR (300 MHz, CDCl<sub>3</sub>): δ=7.9 (d, J=7.2 Hz, 2 H), 7.54 (m, 3 H), 7.46-7.31 (m, 5 H), 4.56 (m, 3 H), 4.12 (m, 2 H), 3.93-3.76 (m, 2 H), 3.12 (m, 2 H), 2.28 (m, 1 H), 1.91 (m, 1 H), 1.37 (t, J=7.1 Hz, 3 H); <sup>13</sup>C NMR (75 MHz, CDCl<sub>3</sub>): δ=214.5, 199.3, 140.1, 136.8, 132.9, 128.5, 128.4, 128.1, 128.0, 126.4, 110.4, 70.2, 65.6, 65.2, 58.9, 35.8, 24.5, 13.7; IR (neat): ν=1682, 1447, 1209, 1042, 745, 689 cm<sup>-1</sup>; MS (ESI): *m/z* = 439.0 [M+Na]<sup>+</sup>. HRMS (ESI) [M+Na]<sup>+</sup> Calcd. for C<sub>22</sub>H<sub>24</sub>O<sub>4</sub>S<sub>2</sub>Na: 439.1014. Found: 439.0975.

#### ***S*-[1-(Diethoxymethyl)-4-(4-methoxyphenyl)-4-oxobutyl] *O*-ethyl dithiocarbonate (24a)**

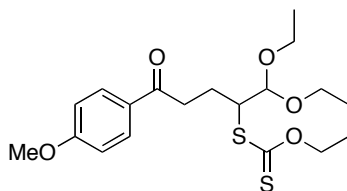

Chemical Formula: C<sub>19</sub>H<sub>28</sub>O<sub>5</sub>S<sub>2</sub>  
 Exact Mass: 400,1378  
 Molecular Weight: 400,5526

The title compound **24a** was prepared following the general procedure for the radical additions initiated by Et<sub>3</sub>B at high temperature (refluxing CH<sub>2</sub>Cl<sub>2</sub>), starting from xanthate **3a** (0.201 g, 0.743 mmol) and acrolein diethylacetal (0.290 g, 2.23 mmol, 3 equiv) in dichloromethane (1.5 mL). After 11 h (0.37 mL, 0.5 equiv of Et<sub>3</sub>B was used), the reaction was worked-up as usually.

Purification by flash chromatography gave compound **24a** as a yellow oil (0.141 g, 47% yield) and compound **3b** (0.029 g, 26%).

This compound was also prepared following the general procedure for the radical additions initiator by Et<sub>3</sub>B at high temperature [refluxing (CH<sub>2</sub>Cl)<sub>2</sub>], starting from xanthate **3a** (0.270 g, 1.0 mmol) and acrolein diethyl acetal **13** (0.260 g, 2.0 mmol, 2 equiv) in 1,2-dichloroethane (1 mL). After 4 h (0.14 mL, 0.14 equiv of Et<sub>3</sub>B was used), the reaction was worked-up as usually. Purification by flash chromatography gave compound **24a** as a yellow oil (0.239 g, 60% yield) without reduced product **3b**.

<sup>1</sup>H NMR (300 MHz, CDCl<sub>3</sub>): δ=7.94 (ddd, J=9 Hz, J=2.9 Hz, J=2.1 Hz, 2 H), 6.92 (ddd, J=9 Hz, J=2.9 Hz, J=2.1 Hz, 2 H), 4.60 (m, 3 H), 4.15 (m, 1 H), 3.86 (s, 3 H), 3.82-3.50 (m, 4 H), 3.14 (m, 2 H), 2.42 (m, 1 H), 2.02 (m, 1 H), 1.38 (t, J=7.1 Hz, 3 H), 1.22 (dt, J=3.4 Hz, J=7.0 Hz, 6 H); <sup>13</sup>C NMR (75 MHz, CDCl<sub>3</sub>): δ=214.8, 198.1, 163.3, 130.3, 130.0, 113.6, 104.0, 70.1, 64.4, 63.7, 55.4, 53.5, 35.4, 23.2, 15.2, 15.2, 13.7; IR (neat): ν=1673, 1597, 1256, 1214, 1168, 1110, 1045, 985, 828 cm<sup>-1</sup>; MS (ESI): *m/z* = 423.1 [M+Na]<sup>+</sup>. HRMS (ESI) [M+Na]<sup>+</sup> Calcd. for C<sub>19</sub>H<sub>28</sub>O<sub>5</sub>S<sub>2</sub>Na: 423.1276. Found: 423.1292.

**10-[(Ethoxycarbonothioyl)thio]-15-[(4-methylphenyl)sulfonyl]-13-oxopentadecyl acetate (25a)**

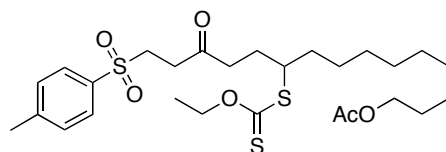

Chemical Formula: C<sub>27</sub>H<sub>42</sub>O<sub>6</sub>S<sub>3</sub>  
Exact Mass: 558,2144  
Molecular Weight: 558,8138

**15-[(4-Methylphenyl)sulfonyl]-13-oxopentadecyl acetate (25b)**

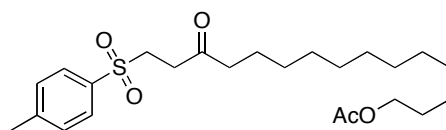

Chemical Formula: C<sub>24</sub>H<sub>38</sub>O<sub>5</sub>S  
Exact Mass: 438,2440  
Molecular Weight: 438,6205

The title compound **25a** was prepared following the general procedure for the radical additions initiated by Et<sub>3</sub>B/O<sub>2</sub> at high temperature (refluxing CH<sub>2</sub>Cl<sub>2</sub>), starting from xanthate **1a** (0.176 g, 0.51 mmol) and olefin **14** (0.216 g, 1.02 mmol, 2 equiv) in dichloromethane (1 mL). After 8 h (0.254 mL, 0.5 equiv of Et<sub>3</sub>B was used), the reaction was worked-up as usually. Purification by flash chromatography gave compound **25a** as a yellow oil (0.177 g, 62% yield) and compound **25b** (0.044 g, 20%).

**Compound 25a:** <sup>1</sup>H NMR (300 MHz, CDCl<sub>3</sub>): δ=7.70 (d, J=8.2 Hz, 2 H), 7.29 (d, J=8.5 Hz, 2 H), 4.56 (d, J=7.1 Hz, 2 H), 3.97 (t, J=6.8 Hz, 2 H), 3.62 (m, 1 H), 3.29 (t, J=7.4 Hz, 2 H), 2.79 (t, J=7.9 Hz, 2 H), 2.52 (brddd, 2 H), 2.38 (s, 3 H), 1.97 (s and m, 4 H), 1.77-1.49 (m, 5 H), 1.35 (t, J=7.1 Hz, 3 H), 1.20 (brs, 12 H); <sup>13</sup>C NMR (75 MHz, CDCl<sub>3</sub>): δ=214.6, 205.2, 171.2, 144.9, 136.0, 130.0, 128.0, 70.0, 64.6, 51.0, 50.6, 39.9, 35.3, 34.6, 29.3, 29.2, 28.6, 28.0, 26.8, 25.9, 21.6, 21.0, 13.8; IR (neat): ν=2925, 1731, 1211, 1145, 1044 cm<sup>-1</sup>; MS (ESI): *m/z*=281.2 [M+Na]<sup>+</sup>. HRMS (ESI) [M+Na]<sup>+</sup> Calcd. for C<sub>27</sub>H<sub>42</sub>O<sub>6</sub>S<sub>3</sub>Na: 581.2041 Found: 581.2060.

**Compound 25b:** <sup>1</sup>H NMR (300 MHz, CDCl<sub>3</sub>): δ=7.71 (d, J=8.3 Hz, 2 H), 7.29 (d, J=8.3 Hz, 2 H), 3.98 (t, J=6.8 Hz, 2 H), 3.28 (t, J=7.5 Hz, 2 H), 2.81 (t, J=7.5 Hz, 2 H), 2.38 (s, 3 H), 2.34 (t, J=7.4 Hz, 2 H), 1.97 (s, 3 H), 1.5 (m, 4 H), 1.18 (s, 16 H); <sup>13</sup>C NMR (75 MHz, CDCl<sub>3</sub>): δ=206.3, 171.2, 144.9, 136.1, 130.0, 128.0, 64.6, 50.6, 42.9, 35.0, 29.3, 29.2, 19.1, 28.6, 25.9, 23.7, 21.6, 21.0; IR (neat): ν=2913, 2847, 1723, 1706, 1253, 1241, 1142, 1084, 714, 767, 720, 686, and 639 cm<sup>-1</sup>; MS (ESI): *m/z* = 461.2 [M+Na]<sup>+</sup>. HRMS (ESI) [M+Na]<sup>+</sup> Calcd. for C<sub>24</sub>H<sub>38</sub>O<sub>5</sub>SNa: 461.2338. Found: 461.2313.

***O*-Ethyl *S*-[6-[(4-methylphenyl)sulfonyl]-4-oxo-1-(2-phenyl-1,3-dioxolan-2-yl)hexyl] dithiocarbonate (**26a**)**

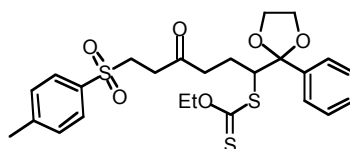

Chemical Formula: C<sub>25</sub>H<sub>30</sub>O<sub>6</sub>S<sub>3</sub>  
Exact Mass: 522,1205  
Molecular Weight 522,6971

The title compound **26a** was prepared following the general procedure for the radical additions initiated by Et<sub>3</sub>B at high temperature (CH<sub>2</sub>Cl<sub>2</sub> reflux), starting from xanthate **1a** (0.260 g, 0.750 mmol) and phenyl vinyl dioxolane (0.264 g, 1.5 mmol, 2 equiv) in dichloromethane (1.5 mL).

After 12.5 h (0.37 mL, 0.37 mmol, 0.5 equiv Et<sub>3</sub>B was used), the reaction was worked-up as usually. Purification by flash chromatography gave compound **26a** as a white solid (0.259 g, 66% yield). The spectral characteristics of **26a** prepared by this method were in agreement with the previously reported data.<sup>6</sup>

m.p. 100.6 – 101.6°C; <sup>1</sup>H NMR (300 MHz, CDCl<sub>3</sub>): δ=7.75 (d, <sup>3</sup>J=8.2 Hz, 2H), 7.48 (d, <sup>3</sup>J=7.8 Hz, 2H), 7.35 (m, 5H), 4.59 (dq, <sup>3</sup>J=1.0 Hz, <sup>3</sup>J=7.1 Hz, 2H), 4.38 (dd, <sup>3</sup>J=3.7 Hz, <sup>3</sup>J=10.3, 1H), 4.15-3.97 (m, 2H), 3.88-3.71 (m, 2H) 3.29 (t, <sup>3</sup>J=7.2 Hz, 2H), 2.79 (m, 2H), 2.55 (m, 2H), 2.45 (s, 3H), 2.05 (m, 1H), 1.69 (m, 1H), 1.40 (t, <sup>3</sup>J=7.1 Hz, 3H); <sup>13</sup>C NMR (75 MHz, CDCl<sub>3</sub>): δ=205.14, 144.92, 139.95, 135.94, 130.00, 128.50, 128.15, 128.00, 126.32, 110.27, 70.45, 65.55, 65.22, 58.85, 50.59, 39.88, 35.20, 23.76, 21.65, 13.78; IR (Nujol): ν =1048; 1111; 1144; 1223; 1298; 1376; 1461; 1721; 2854; 2924; 2954 cm<sup>-1</sup>; MS (ESI): *m/z* (%): 545.1 (100) [M+Na]<sup>+</sup>, 561.1 (20) [M+K]<sup>+</sup>.

**Diethyl {2-[(ethoxycarbonothioyl)thio]-7-[(4-methylphenyl)sulfonyl]-5-oxoheptyl} phosphonate (27a)**

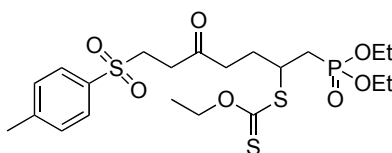

Chemical Formula: C<sub>21</sub>H<sub>33</sub>O<sub>7</sub>PS<sub>3</sub>  
Exact Mass: 524,1126  
Molecular Weight: 524,6513

The title compound **27a** was prepared following the general procedure for the radical additions initiated by Et<sub>3</sub>B/O<sub>2</sub> at high temperature (refluxing CH<sub>2</sub>Cl<sub>2</sub>), starting from xanthate **1a** (0.17 g, 0.491 mmol) and diethyl allylphosphonate **15** (0.219 g, 1.23 mmol, 2.5 equiv) in CH<sub>2</sub>Cl<sub>2</sub> (1 mL). After 4 h (0.15 mL, 0.15 mmol 0.3 equiv of Et<sub>3</sub>B was used), the reaction was worked-up as usually. Purification by flash chromatography gave compound **27a** as a colourless oil (0.152 g, 59% yield) without any traces of reduced product.

<sup>1</sup>H NMR (300 MHz, CDCl<sub>3</sub>): δ=7.74 (d, J=8.3 Hz, 2H), 7.34 (d, J=8.0 Hz, 2H), 4.61 (t, J=7.1 Hz, 2H), 4.09 (m, 4H), 3.95 (m, 1H), 3.30 (t, 2H), 2.83 (dt, J=1.8 Hz, J=7.5 Hz, 2H), 2.59 (dt, J=1.8 Hz, J=7.5 Hz, 2H), 2.43 (s, 3H), 2.31 (m, 2H), 2.08 (m, 1H), 1.89 (m, 1H), 1.40 (t, J=7.1 Hz, 3H),

1.31 (t,  $J=7.1$  Hz, 3H), 1.30 (t,  $J=7.1$  Hz, 3H).  $^{13}\text{C}$  NMR (75 MHz,  $\text{CDCl}_3$ ):  $\delta=212.6, 204.5, 144.9, 135.8, 129.9, 127.9, 70.1, 62.0, 61.9, 61.8, 50.5, 45.0, 39.7, 35.2, 32.5, 30.7, 27.4, 27.3, 21.6, 16.37, 16.31, 13.7$ . IR (neat):  $\nu=1715, 1216, 1144, 1111, 1086, 1040, 1018, 959, 812\text{ cm}^{-1}$ . HRMS (ESI)  $[\text{M}+\text{Na}]^+$  Calcd. for  $\text{C}_{21}\text{H}_{33}\text{O}_7\text{PS}_3\text{Na}$ : 547.1024. Found: 547.1058.

## 2-[(Ethoxycarbonothioyl)thio]-6,6-dimethyl-5-oxoheptyl acetate (**28a**)

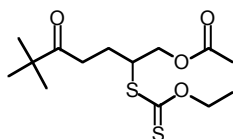

Chemical Formula:  $\text{C}_{14}\text{H}_{24}\text{O}_4\text{S}_2$

Exact Mass: 320.1116

Molecular Weight: 320.468

The title compound **28a** was prepared following the general procedure for the radical additions initiator by  $\text{Et}_3\text{B}$  at high temperature (DCE reflux), starting from xanthate **5a** (0.206 g, 0.935 mmol, 1 equiv) and allyl acetate **7** (0.187 g, 1.87 mmol, 2 equiv) in 1,2-dichloroethane (1 mL). After 3.5 h (0.11 mL, 0.11 mmol, 0.11 equiv  $\text{Et}_3\text{B}$  was used), the reaction was worked-up as usually. Purification by flash chromatography gave compound **28a** as a yellow oil (0.23 g, 77% yield) without any reduced products. The spectral characteristics of **28a** prepared by this method were in agreement with the previously reported data.<sup>8</sup>

$^1\text{H}$  NMR (300 MHz,  $\text{CDCl}_3$ ):  $\delta=7.52$  (dd,  $^3J=1.5$  Hz and  $^3J'=7.8$  Hz, 2H), 7.35 (3H, m), 4.59 (2H, m), 4.43 (dd,  $^3J=3.7$  Hz and  $^3J'=10.4$  Hz, 1H), 4.09 (m, 2H), 3.82 (m, 2H), 2.60 (m, 2H), 2.07 (m, 1H), 1.67 (m, 1H), 1.41 (t,  $^3J=7.0$  Hz, 3H), 1.07 (s, 9H);  $^{13}\text{C}$  NMR (75 MHz,  $\text{CDCl}_3$ ):  $\delta=215.00, 214.64, 140.16, 128.37, 128.05, 126.40, 110.40, 70.114, 65.54, 65.21, 58.76, 44.00, 33.77, 26.48, 24.00, 13.75$ ; IR (neat):  $\nu=2964, 1702, 1476, 1446, 1364, 1208, 1109, 1043, 774, 698, 640\text{ cm}^{-1}$ ; HRMS (ESI):  $[\text{M}+\text{Na}]^+$  Calcd. for  $\text{C}_{20}\text{H}_{28}\text{O}_4\text{S}_2\text{Na}$ : 419.1327. Found: 419.1332.

## *S*-1-(Benzyloxy)-4-methyl-5-oxo-7-tosylheptan-2-yl *O*-ethyl carbonodithioate (**29a**)



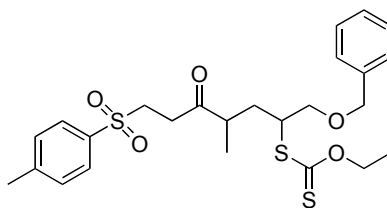

The title compound **29a** was prepared following the general procedure for the radical additions initiated by Et<sub>3</sub>B at high temperature (DCE reflux), starting from xanthate **6a** (0.36 g, 1.0 mmol, 1 equiv) and allyl benzyl ether **16** (0.296 g, 2.0 mmol, 2 equiv) in 1,2-dichloroethane (1 mL). After 14 h (0.4 mL, 0.4 mmol, 0.4 equiv Et<sub>3</sub>B was used), the reaction was worked-up as usually. Purification by flash chromatography gave compound **29a** as a colourless syrup (0.272 g, 54% yield) without any traces of reduced compound.

<sup>1</sup>H NMR (300 MHz, CDCl<sub>3</sub>): δ=7.78 (2d, 2H), 7.33 (m, 7H), 4.64 and 4.61 (2q, <sup>3</sup>J=7.1 Hz, 2H), 4.53 and 4.52 (2s, 2H), 3.94 and 3.88 (m, 1H), 3.68 and 3.56 (2m, 2H), 3.35 (m, 2H), 3.08-2.69 (m, 2H), 2.45 (s, 3H), 2.32 (m, 1H), 2.02 and 1.86 (2m, 1H), 1.60 (m, 1H), 1.42 and 1.40 (2t, <sup>3</sup>J=7.1 Hz, 3H), 1.12 and 1.11 (2d, <sup>3</sup>J=7.0 Hz, 3H); <sup>13</sup>C NMR (75 MHz, CDCl<sub>3</sub>): 214.18, δ=208.97, 136.03, 130.00, 128.42, 127.98, 127.78, 127.75, 127.69, 127.65, 73.10, 73.01, 72.12, 72.04, 70.33, 50.65, 49.33, 48.67, 44.01, 43.77, 33.97, 33.92, 33.52, 33.42, 21.64, 17.63, 16.70, 13.77; IR (neat): ν =1712, 1596, 1453, 1313, 1212, 1146, 1109, 1086, 1040, 999, 813, 734, 696 cm<sup>-1</sup>; HRMS (ESI): [M+Na]<sup>+</sup> Calcd. for C<sub>25</sub>H<sub>32</sub>O<sub>5</sub>S<sub>3</sub>Na: 531.1310. Found: 531.1319.

## 2-[(Ethoxycarbonothioyl)thio]-5-(4-methoxyphenyl)-5-oxopentyl acetate (30a)

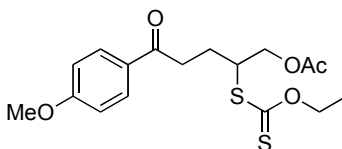

Chemical Formula: C<sub>17</sub>H<sub>22</sub>O<sub>5</sub>S<sub>2</sub>  
 Exact Mass: 370,0909  
 Molecular Weight: 370,4836

The title compound **30a** was prepared following the general procedure for the radical additions initiated by Et<sub>3</sub>B/O<sub>2</sub> at high temperature (refluxing CH<sub>2</sub>Cl<sub>2</sub>), starting from xanthate **3a** (0.205 g, 0.758 mmol) and allyl acetate **7** (0.190 g, 0.19 mmol, 2.5 equiv) in dichloromethane (1 mL).

After 8 h (0.38 mL, 0.5 equiv of Et<sub>3</sub>B was used), the reaction was worked-up as usually. Purification by flash chromatography gave compound **30a** as a yellow oil (0.137 g, 49% yield), and the compound **3b** (0.033 g, 29%). The spectral characteristics of **30a** prepared by this method were in agreement with the previously reported data.

This compound was also prepared following the general procedure for the radical additions initiated by Et<sub>3</sub>B/O<sub>2</sub> at high temperature [refluxing (CH<sub>2</sub>Cl)<sub>2</sub>], starting from xanthate **4a** (0.271 g, 1.0 mmol) and allyl acetate **8** (0.201 g, 2.0 mmol, 2 equiv) in 1,2-dichloroethane (1 mL). After 4 h (0.11 mL, 0.11 mmol, 0.11 equiv of Et<sub>3</sub>B was used), the reaction was worked-up as usually. Purification by flash chromatography gave compound **22a** as a yellow oil (0.263 g, 71% yield) without any traces of compound **4b**.<sup>9</sup>

**Compound 30a:** <sup>1</sup>H NMR (300 MHz, CDCl<sub>3</sub>): δ=7.95 (ddd, J=9.0 Hz, J=2.8 Hz, J=2/1 Hz, 2 H), 6.94 (ddd, J=9.0 Hz, J=2.8 Hz, J=2.1 Hz, 2 H), 4.63 (m, 2 H), 4.33 (m, 3 H), 4.01 (m, 1 H), 3.88 (s, 3 H), 3.13 (m, 2 H), 2.3 (m, 1 H), 2.08 (s, 3 H), 2.01 (m, 1 H), 1.40 (t, J=7.1 Hz, 3H); <sup>13</sup>C NMR (75 MHz, CDCl<sub>3</sub>): δ= 212.8, 197.1, 170.5, 163.5, 130.2, 129.7, 113.7, 70.2, 65.6, 55.4, 49.0, 35.1, 25.1, 20.7, 13.6; IR (neat): ν=1738, 1673, 1598, 1212, 1168, 1110, 1041, 983, and 837 cm<sup>-1</sup>; MS (ESI): *m/z* = 393.1 [M+Na]<sup>+</sup>.

#### 5-(4-Chlorophenyl)-2-[(ethoxycarbonothioyl)thio]-5-oxopentyl acetate (**31a**)

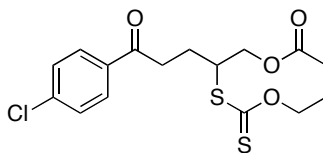

Chemical Formula: C<sub>16</sub>H<sub>19</sub>ClO<sub>4</sub>S<sub>2</sub>  
 Exact Mass: 374,0413  
 Molecular Weight: 374,9027

The title compound **31a** was prepared following the general procedure for the radical additions initiated by Et<sub>3</sub>B/O<sub>2</sub> at high temperature [refluxing (CH<sub>2</sub>Cl)<sub>2</sub>], starting from xanthate **4a** (0.275 g, 1.0 mmol) and allyl acetate **7** (0.200 g, 2.0 mmol, 2 equiv) in 1,2-dichloroethane (1 mL). After 4 h (0.11mL, 0.11 mmol 0.11 equiv of Et<sub>3</sub>B was used), the reaction was worked-up as usually. Purification by flash chromatography gave compound **31a** as a yellow oil (0.275 g, 73% yield) without any reduced products.

$^1\text{H}$  NMR (300 MHz,  $\text{CDCl}_3$ ):  $\delta$ =7.88 (ddd,  $J$ =8.8 Hz,  $J$ =2.4 Hz,  $J$ =2.0 Hz, 2 H), 7.42 (ddd,  $J$ =8.8 Hz,  $J$ =2.4 Hz,  $J$ =2.0 Hz, 2 H), 4.62 (dq,  $J$ =1.4 Hz,  $J$ =7.1 Hz, 2 H), 4.36 (dd,  $J$ =11.4 Hz,  $J$ =4.9 Hz, 1 H), 4.27 (dd,  $J$ =11.4 Hz,  $J$ =6.2 Hz, 1 H), 4.06 (m, 1 H), 3.14 (dt,  $J$ =1.6 Hz,  $J$ =7.6 Hz, 2H), 2.31 (m, 1 H), 2.07 (s, 3 H), 2.01 (m, 1 H), 1.4 (t, 3 H);  $^{13}\text{C}$  NMR (75 MHz,  $\text{CDCl}_3$ ):  $\delta$ =212.7, 197.4, 170.5, 139.6, 134.9, 129.4, 128.9, 70.3, 65.6, 48.9, 35.5, 24.9, 20.7, 13.6; IR (neat):  $\nu$ =1738, 1682, 1588, 1211, 1090, 1041, 1012, 983  $\text{cm}^{-1}$ ; MS (ESI):  $m/z$  (%) = 397.0 [ $\text{C}_{16}\text{H}_{19}\text{Cl}^{35}\text{O}_4\text{S}_2\text{Na}$ ] $^+$  (100), 399.0 [ $\text{C}_{16}\text{H}_{19}\text{Cl}^{37}\text{O}_4\text{S}_2\text{Na}$ ] $^+$  (25). HRMS (ESI) [ $\text{M}+\text{Na}$ ] $^+$  Calcd. for  $\text{C}_{16}\text{H}_{19}\text{Cl}^{35}\text{O}_4\text{S}_2\text{Na}$ : 397.0311. Found: 397.0301.

## References

---

- <sup>1</sup> Brown, M. D.; Gillon, D. W.; Meakins, G.; Whitham, G. H. *J.Chem. Soc. Perkin Trans. I* **1985**, 1623-1626.
- <sup>2</sup> Gutzmann, J.; Messinger, P. *Arch. Pharm. (Weinheim Ger.)* **1995**, 328, 6, 523-526
- <sup>3</sup> Wang, P.; Blank, D. H.; Spencer, T. A. *J. Org. Chem.* **2004**, 69, 2693-2702.
- <sup>4</sup> Whitham, G. H.; Bridges, A. J. *J. Chem. Soc. Perkin. Trans. I* **1975**, 1603-1606.
- <sup>5</sup> Batanero, B.; Picazo, O.; Barba, F. *J. Org. Chem.* **2001**, 66, 320-322. (b) Boivin, J.; Pothier, J.; Zard, S. Z., *Tetrahedron Lett.* **1999**, 40, 3701-3704.
- <sup>6</sup> Boivin J.; Jrad, R.; Juge, S.; Nguyen, V. T. *Org. Lett.* **2003**, 5, 1645-1648.
- <sup>7</sup> Pinnick, H.W.; Reynolds, M.A. *J. Org. Chem.* **1979**, 44, 160-161.
- <sup>8</sup> Part 1 Boivin, J.; Nguyen, V. T. *J. Org. Chem.* **2007**, submitted.
- <sup>9</sup> Liard, A.; Quiclet-Sire, B.; Saicic, R. N.; Zard, S. Z. *Tetrahedron Lett.* **1997**, 38, 1759-1762.
